# Supplementary material for: Plasma miR-323 as a Biomarker for Screening Papillary Thyroid Cancer From Healthy Controls
Source: Front Med (Lausanne). 2020 May 15;7:122. doi: 10.3389/fmed.2020.00122 (PMC7242560; doi:10.3389/fmed.2020.00122)
Supplement: Supplementary Table 1 — Clinical features, including gender, tumor size, capsular invasion, lymph node metastasis, number of cancer foci, and BRAF nutation, were presented in healthy controls and PTC and BTN patients. [file Data_Sheet_1.xlsx]

## Sheet: TargetScan7
Target gene	Representative transcript	Gene name
EIF1	ENST00000469257.1	eukaryotic translation initiation factor 1
ARL1	ENST00000261636.8	ADP-ribosylation factor-like 1
TMEFF2	ENST00000392314.1	transmembrane protein with EGF-like and two follistatin-like domains 2
COMMD8	ENST00000381571.4	COMM domain containing 8
LMO3	ENST00000354662.1	LIM domain only 3 (rhombotin-like 2)
CHODL	ENST00000400128.1	chondrolectin
C1orf52	ENST00000471115.1	chromosome 1 open reading frame 52
NLK	ENST00000407008.3	nemo-like kinase
BRINP1	ENST00000265922.3	bone morphogenetic protein/retinoic acid inducible neural-specific 1
ADIPOR1	ENST00000340990.5	adiponectin receptor 1
FAM135A	ENST00000418814.2	family with sequence similarity 135, member A
DUSP22	ENST00000419235.2	dual specificity phosphatase 22
SGK1	ENST00000367858.5	serum/glucocorticoid regulated kinase 1
MAB21L1	ENST00000379919.4	mab-21-like 1 (C. elegans)
UBE2Q1	ENST00000292211.4	ubiquitin-conjugating enzyme E2Q family member 1
UBE2K	ENST00000261427.5	ubiquitin-conjugating enzyme E2K
CMTM8	ENST00000307526.3	CKLF-like MARVEL transmembrane domain containing 8
PDE4B	ENST00000371045.5	phosphodiesterase 4B, cAMP-specific
NFYB	ENST00000240055.3	nuclear transcription factor Y, beta
ANKRD34B	ENST00000338682.3	ankyrin repeat domain 34B
CDKN1B	ENST00000228872.4	cyclin-dependent kinase inhibitor 1B (p27, Kip1)
KCNMB2	ENST00000432997.1	potassium large conductance calcium-activated channel, subfamily M, beta member 2
FAM168B	ENST00000409185.1	family with sequence similarity 168, member B
ARL5A	ENST00000295087.8	ADP-ribosylation factor-like 5A
PUM1	ENST00000424085.2	pumilio RNA-binding family member 1
PBX3	ENST00000342287.5	pre-B-cell leukemia homeobox 3
IGSF3	ENST00000369486.3	immunoglobulin superfamily, member 3
GGNBP2	ENST00000304718.4	gametogenetin binding protein 2
PCDH8	ENST00000377942.3	protocadherin 8
GAD1	ENST00000358196.3	glutamate decarboxylase 1 (brain, 67kDa)
UBAP2	ENST00000379238.1	ubiquitin associated protein 2
ZFP69B	ENST00000484445.1	ZFP69 zinc finger protein B
APP	ENST00000346798.3	amyloid beta (A4) precursor protein
CRLS1	ENST00000378863.4	cardiolipin synthase 1
POU4F2	ENST00000281321.3	POU class 4 homeobox 2
LMO7	ENST00000341547.4	LIM domain 7
VSNL1	ENST00000406397.1	visinin-like 1
NUP62CL	ENST00000372461.3	nucleoporin 62kDa C-terminal like
CCDC68	ENST00000591504.1	coiled-coil domain containing 68
KALRN	ENST00000393496.1	kalirin, RhoGEF kinase
PCBP1	ENST00000303577.5	poly(rC) binding protein 1
TGFA	ENST00000295400.6	transforming growth factor, alpha
ULK2	ENST00000395544.4	unc-51 like autophagy activating kinase 2
BTBD3	ENST00000254977.3	BTB (POZ) domain containing 3
TNFSF11	ENST00000405262.2	tumor necrosis factor (ligand) superfamily, member 11
LSM14B	ENST00000253001.4	LSM14B, SCD6 homolog B (S. cerevisiae)
CPE	ENST00000402744.4	carboxypeptidase E
AFTPH	ENST00000238856.4	aftiphilin
KIAA1598	ENST00000260777.10	KIAA1598
SLC30A7	ENST00000370112.4	solute carrier family 30 (zinc transporter), member 7
SUMO1	ENST00000392246.2	small ubiquitin-like modifier 1
SLC25A12	ENST00000422440.2	solute carrier family 25 (aspartate/glutamate carrier), member 12
PLEKHA5	ENST00000429027.2	pleckstrin homology domain containing, family A member 5
HP1BP3	ENST00000312239.5	heterochromatin protein 1, binding protein 3
ZFPM2	ENST00000407775.2	zinc finger protein, FOG family member 2
RNF11	ENST00000242719.3	ring finger protein 11
ENOX1	ENST00000261488.6	ecto-NOX disulfide-thiol exchanger 1
SLAIN1	ENST00000418532.1	SLAIN motif family, member 1
YAF2	ENST00000327791.4	YY1 associated factor 2
GABRP	ENST00000519385.1	gamma-aminobutyric acid (GABA) A receptor, pi
PI4K2A	ENST00000370649.3	Phosphatidylinositol 4-kinase type 2-alpha; Uncharacterized protein
SCYL2	ENST00000360820.2	SCY1-like 2 (S. cerevisiae)
GCLM	ENST00000370238.3	glutamate-cysteine ligase, modifier subunit
RCAN1	ENST00000482533.1	regulator of calcineurin 1
BRI3	ENST00000297290.3	brain protein I3
RBM5	ENST00000347869.3	RNA binding motif protein 5
VAPB	ENST00000395802.3	VAMP (vesicle-associated membrane protein)-associated protein B and C
C16orf87	ENST00000394806.2	chromosome 16 open reading frame 87
NIPBL	ENST00000448238.2	Nipped-B homolog (Drosophila)
ETV3	ENST00000368192.4	ets variant 3
PCBP2	ENST00000455667.3	poly(rC) binding protein 2
NPPC	ENST00000409852.1	natriuretic peptide C
AC007405.2	ENST00000409786.1	Uncharacterized protein
ENAH	ENST00000366844.3	enabled homolog (Drosophila)
GALNT1	ENST00000269195.5	UDP-N-acetyl-alpha-D-galactosamine:polypeptide N-acetylgalactosaminyltransferase 1 (GalNAc-T1)
G3BP2	ENST00000395719.3	GTPase activating protein (SH3 domain) binding protein 2
RPS27L	ENST00000330964.5	ribosomal protein S27-like
TBX20	ENST00000408931.3	T-box 20
APPL1	ENST00000288266.3	adaptor protein, phosphotyrosine interaction, PH domain and leucine zipper containing 1
NEK6	ENST00000373603.1	NIMA-related kinase 6
HSPA4	ENST00000304858.2	heat shock 70kDa protein 4
GPBP1	ENST00000424459.3	GC-rich promoter binding protein 1
PSMC6	ENST00000445930.2	proteasome (prosome, macropain) 26S subunit, ATPase, 6
ZNF365	ENST00000395254.3	zinc finger protein 365
MSL3	ENST00000312196.4	male-specific lethal 3 homolog (Drosophila)
HTRA1	ENST00000368984.3	HtrA serine peptidase 1
MAP3K2	ENST00000409947.1	mitogen-activated protein kinase kinase kinase 2
LCA5	ENST00000369846.4	Leber congenital amaurosis 5
SEZ6	ENST00000317338.12	seizure related 6 homolog (mouse)
SERTAD4	ENST00000367012.3	SERTA domain containing 4
SP9	ENST00000394967.2	Sp9 transcription factor
FMR1	ENST00000370471.3	fragile X mental retardation 1
RNF214	ENST00000530849.1	ring finger protein 214
GNAQ	ENST00000286548.4	guanine nucleotide binding protein (G protein), q polypeptide
RCN2	ENST00000394885.3	reticulocalbin 2, EF-hand calcium binding domain
CREBL2	ENST00000228865.2	cAMP responsive element binding protein-like 2
HNRNPK	ENST00000376281.4	heterogeneous nuclear ribonucleoprotein K
KRAS	ENST00000256078.4	Kirsten rat sarcoma viral oncogene homolog
FHL5	ENST00000541107.1	four and a half LIM domains 5
FLRT3	ENST00000378053.3	fibronectin leucine rich transmembrane protein 3
SMAD2	ENST00000262160.6	SMAD family member 2
PPTC7	ENST00000354300.3	PTC7 protein phosphatase homolog (S. cerevisiae)
MTCH2	ENST00000302503.3	mitochondrial carrier 2
SALL3	ENST00000575389.2	sal-like 3 (Drosophila)
BMP3	ENST00000282701.2	bone morphogenetic protein 3
STAG2	ENST00000371160.1	stromal antigen 2
FUT9	ENST00000302103.5	fucosyltransferase 9 (alpha (1,3) fucosyltransferase)
LPPR5	ENST00000370188.3	Lipid phosphate phosphatase-related protein type 5
ZNF395	ENST00000344423.5	zinc finger protein 395
UBE2B	ENST00000265339.2	ubiquitin-conjugating enzyme E2B
MAPKAPK5	ENST00000550735.2	mitogen-activated protein kinase-activated protein kinase 5
MACC1	ENST00000400331.5	metastasis associated in colon cancer 1
EMC4	ENST00000267750.4	ER membrane protein complex subunit 4
SLITRK3	ENST00000475390.1	SLIT and NTRK-like family, member 3
ZZZ3	ENST00000370801.3	zinc finger, ZZ-type containing 3
EFNA3	ENST00000505139.1	Ephrin-A3; Uncharacterized protein; cDNA FLJ57652, highly similar to Ephrin-A3
TBC1D19	ENST00000264866.4	TBC1 domain family, member 19
PNISR	ENST00000369239.5	PNN-interacting serine/arginine-rich protein
ALS2	ENST00000457679.2	amyotrophic lateral sclerosis 2 (juvenile)
ZNF148	ENST00000360647.4	zinc finger protein 148
SRGAP1	ENST00000355086.3	SLIT-ROBO Rho GTPase activating protein 1
SEC23B	ENST00000336714.3	Sec23 homolog B (S. cerevisiae)
GOLIM4	ENST00000470487.1	golgi integral membrane protein 4
ARX	ENST00000379044.4	aristaless related homeobox
LRRC4	ENST00000249363.3	leucine rich repeat containing 4
TSPAN3	ENST00000267970.4	tetraspanin 3
MTMR2	ENST00000346299.5	myotubularin related protein 2
PSME3	ENST00000541124.1	proteasome (prosome, macropain) activator subunit 3 (PA28 gamma; Ki)
CLVS2	ENST00000275162.5	clavesin 2
GPR22	ENST00000304402.4	G protein-coupled receptor 22
LPHN3	ENST00000512091.2	latrophilin 3
PSPC1	ENST00000338910.4	paraspeckle component 1
SMC3	ENST00000361804.4	structural maintenance of chromosomes 3
IFRD1	ENST00000403825.3	interferon-related developmental regulator 1
NFIA	ENST00000403491.3	nuclear factor I/A
TP73	ENST00000378280.1	tumor protein p73
ZADH2	ENST00000322342.3	zinc binding alcohol dehydrogenase domain containing 2
NR4A2	ENST00000409108.2	nuclear receptor subfamily 4, group A, member 2
SORCS1	ENST00000369698.1	sortilin-related VPS10 domain containing receptor 1
DSTYK	ENST00000367160.4	dual serine/threonine and tyrosine protein kinase
C11orf30	ENST00000529032.1	chromosome 11 open reading frame 30
ARF6	ENST00000298316.5	ADP-ribosylation factor 6
CERS5	ENST00000317551.6	ceramide synthase 5
GRM7	ENST00000486284.1	glutamate receptor, metabotropic 7
CPEB4	ENST00000265085.5	cytoplasmic polyadenylation element binding protein 4
ZNF207	ENST00000394670.4	zinc finger protein 207
RNF149	ENST00000295317.3	ring finger protein 149
RORA	ENST00000335670.6	RAR-related orphan receptor A
CAND1	ENST00000545606.1	cullin-associated and neddylation-dissociated 1
PHLDA1	ENST00000602540.1	pleckstrin homology-like domain, family A, member 1
ENPP6	ENST00000296741.2	ectonucleotide pyrophosphatase/phosphodiesterase 6
RNF2	ENST00000367510.3	ring finger protein 2
MITF	ENST00000328528.6	microphthalmia-associated transcription factor
VSTM4	ENST00000332853.4	V-set and transmembrane domain containing 4
TRPS1	ENST00000395715.3	trichorhinophalangeal syndrome I
ATP11A	ENST00000487903.1	ATPase, class VI, type 11A
PPP4R2	ENST00000356692.5	protein phosphatase 4, regulatory subunit 2
VIL1	ENST00000248444.5	villin 1
UBE2F	ENST00000272930.4	ubiquitin-conjugating enzyme E2F (putative)
POLI	ENST00000579534.1	polymerase (DNA directed) iota
ATXN3	ENST00000545170.1	ataxin 3
NFKBID	ENST00000396901.1	nuclear factor of kappa light polypeptide gene enhancer in B-cells inhibitor, delta
TRAPPC10	ENST00000291574.4	trafficking protein particle complex 10
KLHL3	ENST00000541417.1	kelch-like family member 3
BZW1	ENST00000409600.1	basic leucine zipper and W2 domains 1
EGR3	ENST00000519492.1	early growth response 3
ELAVL2	ENST00000380110.4	ELAV like neuron-specific RNA binding protein 2
GREM2	ENST00000318160.4	gremlin 2, DAN family BMP antagonist
FAM196B	ENST00000377365.3	family with sequence similarity 196, member B
MAP7	ENST00000354570.3	microtubule-associated protein 7
MAP4K5	ENST00000013125.4	mitogen-activated protein kinase kinase kinase kinase 5
RAP1GAP2	ENST00000254695.8	RAP1 GTPase activating protein 2
HK2	ENST00000290573.2	hexokinase 2
SLC7A14	ENST00000231706.5	solute carrier family 7, member 14
RHEB	ENST00000262187.5	Ras homolog enriched in brain
SPTSSA	ENST00000298130.4	serine palmitoyltransferase, small subunit A
CASQ1	ENST00000368078.3	calsequestrin 1 (fast-twitch, skeletal muscle)
EDN2	ENST00000372587.4	endothelin 2
DNAJC6	ENST00000395325.3	DnaJ (Hsp40) homolog, subfamily C, member 6
SBNO1	ENST00000420886.2	strawberry notch homolog 1 (Drosophila)
CGGBP1	ENST00000309534.6	CGG triplet repeat binding protein 1
C6orf89	ENST00000480824.2	chromosome 6 open reading frame 89
FBXO3	ENST00000526785.1	F-box protein 3
CPEB3	ENST00000412050.4	cytoplasmic polyadenylation element binding protein 3
TM2D3	ENST00000347970.3	TM2 domain containing 3
SPTBN1	ENST00000356805.4	spectrin, beta, non-erythrocytic 1
CLPTM1L	ENST00000320895.5	CLPTM1-like
ADAM10	ENST00000260408.3	ADAM metallopeptidase domain 10
PPFIBP1	ENST00000318304.8	PTPRF interacting protein, binding protein 1 (liprin beta 1)
FOXB1	ENST00000396057.4	forkhead box B1
KCNJ6	ENST00000609713.1	potassium inwardly-rectifying channel, subfamily J, member 6
ESRRA	ENST00000405666.1	estrogen-related receptor alpha
LCOR	ENST00000371103.3	ligand dependent nuclear receptor corepressor
AUTS2	ENST00000342771.4	autism susceptibility candidate 2
FBXO30	ENST00000237281.4	F-box protein 30
MYT1L	ENST00000399161.2	myelin transcription factor 1-like
SEPT7	ENST00000435235.1	septin 7
ELMSAN1	ENST00000394071.2	ELM2 and Myb/SANT-like domain containing 1
HIPK3	ENST00000303296.4	homeodomain interacting protein kinase 3
RAP1GDS1	ENST00000408927.3	RAP1, GTP-GDP dissociation stimulator 1
OTUD5	ENST00000156084.4	OTU domain containing 5
FOXP2	ENST00000408937.3	forkhead box P2
PPP1CB	ENST00000395366.2	protein phosphatase 1, catalytic subunit, beta isozyme
MAML3	ENST00000509479.2	mastermind-like 3 (Drosophila)
CACNA1G	ENST00000352832.5	calcium channel, voltage-dependent, T type, alpha 1G subunit
RBM24	ENST00000379052.5	RNA binding motif protein 24
BPTF	ENST00000321892.4	bromodomain PHD finger transcription factor
THSD7A	ENST00000423059.4	thrombospondin, type I, domain containing 7A
SPRY3	ENST00000302805.2	sprouty homolog 3 (Drosophila)
RBM27	ENST00000265271.5	RNA binding motif protein 27
DIP2C	ENST00000280886.6	DIP2 disco-interacting protein 2 homolog C (Drosophila)
CUL2	ENST00000374746.1	cullin 2
MXD1	ENST00000264444.2	MAX dimerization protein 1
ESCO1	ENST00000269214.5	establishment of sister chromatid cohesion N-acetyltransferase 1
TMEM30A	ENST00000230461.6	transmembrane protein 30A
FNIP1	ENST00000307968.7	folliculin interacting protein 1
AKAP11	ENST00000025301.2	A kinase (PRKA) anchor protein 11
BCL2	ENST00000398117.1	B-cell CLL/lymphoma 2
SLC44A1	ENST00000374720.3	solute carrier family 44 (choline transporter), member 1
MMP14	ENST00000311852.6	matrix metallopeptidase 14 (membrane-inserted)
TET2	ENST00000545826.1	tet methylcytosine dioxygenase 2
IKZF2	ENST00000457361.1	IKAROS family zinc finger 2 (Helios)
TBC1D4	ENST00000377636.3	TBC1 domain family, member 4
NUDT5	ENST00000491614.1	nudix (nucleoside diphosphate linked moiety X)-type motif 5
HMGCS1	ENST00000325110.6	3-hydroxy-3-methylglutaryl-CoA synthase 1 (soluble)
LDHA	ENST00000227157.4	lactate dehydrogenase A
AZIN1	ENST00000337198.5	antizyme inhibitor 1
NASP	ENST00000350030.3	nuclear autoantigenic sperm protein (histone-binding)
ONECUT2	ENST00000491143.2	one cut homeobox 2
RAB3GAP2	ENST00000358951.2	RAB3 GTPase activating protein subunit 2 (non-catalytic)
PDE4D	ENST00000340635.6	phosphodiesterase 4D, cAMP-specific
TMEM164	ENST00000372073.1	transmembrane protein 164
HSPA13	ENST00000285667.3	heat shock protein 70kDa family, member 13
KLF3	ENST00000261438.5	Kruppel-like factor 3 (basic)
FAXC	ENST00000389677.5	failed axon connections homolog (Drosophila)
RSBN1L	ENST00000334955.8	round spermatid basic protein 1-like
KCND3	ENST00000369697.1	potassium voltage-gated channel, Shal-related subfamily, member 3
CNBP	ENST00000502976.1	CCHC-type zinc finger, nucleic acid binding protein
FAM199X	ENST00000493442.1	family with sequence similarity 199, X-linked
SUCO	ENST00000367723.4	SUN domain containing ossification factor
IRF2BPL	ENST00000238647.3	interferon regulatory factor 2 binding protein-like
PRKAA2	ENST00000371244.4	protein kinase, AMP-activated, alpha 2 catalytic subunit
E2F3	ENST00000346618.3	E2F transcription factor 3
CDH11	ENST00000394156.3	cadherin 11, type 2, OB-cadherin (osteoblast)
ASB7	ENST00000332783.7	ankyrin repeat and SOCS box containing 7
DOCK4	ENST00000428084.1	dedicator of cytokinesis 4
CHUK	ENST00000370397.7	conserved helix-loop-helix ubiquitous kinase
KCNB1	ENST00000371741.4	potassium voltage-gated channel, Shab-related subfamily, member 1
MFSD2A	ENST00000372811.5	major facilitator superfamily domain containing 2A
KIAA1468	ENST00000398130.2	KIAA1468
RNF152	ENST00000312828.3	ring finger protein 152
ELF1	ENST00000442101.1	E74-like factor 1 (ets domain transcription factor)
PAPPA2	ENST00000367662.3	pappalysin 2
GCA	ENST00000437150.2	grancalcin, EF-hand calcium binding protein
ATP1B1	ENST00000367816.1	ATPase, Na+/K+ transporting, beta 1 polypeptide
NOL4	ENST00000261592.5	nucleolar protein 4
CDC27	ENST00000066544.3	cell division cycle 27
SGTB	ENST00000381007.4	small glutamine-rich tetratricopeptide repeat (TPR)-containing, beta
ST7L	ENST00000360743.4	suppression of tumorigenicity 7 like
TSC22D2	ENST00000361875.3	TSC22 domain family, member 2
PIP5K1A	ENST00000368890.4	phosphatidylinositol-4-phosphate 5-kinase, type I, alpha
EPHA5	ENST00000273854.3	EPH receptor A5
HDX	ENST00000297977.5	highly divergent homeobox
SP8	ENST00000418710.2	Sp8 transcription factor
CSRNP3	ENST00000314499.7	cysteine-serine-rich nuclear protein 3
AGO1	ENST00000373204.4	argonaute RISC catalytic component 1
RFX3	ENST00000382004.3	regulatory factor X, 3 (influences HLA class II expression)
CCNYL1	ENST00000295414.3	cyclin Y-like 1
MPP6	ENST00000222644.5	membrane protein, palmitoylated 6 (MAGUK p55 subfamily member 6)
STRN3	ENST00000355683.5	striatin, calmodulin binding protein 3
DAB2IP	ENST00000408936.3	DAB2 interacting protein
KCNQ3	ENST00000388996.4	potassium voltage-gated channel, KQT-like subfamily, member 3
NFIX	ENST00000360105.4	nuclear factor I/X (CCAAT-binding transcription factor)
TMEM65	ENST00000297632.6	transmembrane protein 65
BEND4	ENST00000504360.1	BEN domain containing 4
PRICKLE1	ENST00000455697.1	prickle homolog 1 (Drosophila)
FOCAD	ENST00000380249.1	focadhesin
SEL1L	ENST00000336735.4	sel-1 suppressor of lin-12-like (C. elegans)
PHLPP2	ENST00000568954.1	PH domain and leucine rich repeat protein phosphatase 2
TEAD3	ENST00000402886.3	TEA domain family member 3
RPS6KA3	ENST00000379565.3	ribosomal protein S6 kinase, 90kDa, polypeptide 3
EEA1	ENST00000322349.8	early endosome antigen 1
HSDL2	ENST00000398805.3	hydroxysteroid dehydrogenase like 2
PXDC1	ENST00000380283.4	PX domain containing 1
KLF11	ENST00000305883.1	Kruppel-like factor 11
KMT2E	ENST00000334877.4	lysine (K)-specific methyltransferase 2E
TMX1	ENST00000457354.2	thioredoxin-related transmembrane protein 1
TBL1XR1	ENST00000430069.1	transducin (beta)-like 1 X-linked receptor 1
LRP12	ENST00000424843.2	low density lipoprotein receptor-related protein 12
EFCAB14	ENST00000371933.3	EF-hand calcium binding domain 14
CCND2	ENST00000261254.3	cyclin D2
ROCK2	ENST00000315872.6	Rho-associated, coiled-coil containing protein kinase 2
ARID1B	ENST00000346085.5	AT rich interactive domain 1B (SWI1-like)
CLLU1	ENST00000378485.1	chronic lymphocytic leukemia up-regulated 1
EED	ENST00000327320.4	embryonic ectoderm development
MKLN1	ENST00000352689.6	muskelin 1, intracellular mediator containing kelch motifs
REL	ENST00000295025.8	v-rel avian reticuloendotheliosis viral oncogene homolog
CACNA1C	ENST00000399655.1	calcium channel, voltage-dependent, L type, alpha 1C subunit
ZNF706	ENST00000311212.4	zinc finger protein 706
AAK1	ENST00000409085.4	AP2 associated kinase 1
DKK2	ENST00000285311.3	dickkopf WNT signaling pathway inhibitor 2
DGKH	ENST00000261491.5	diacylglycerol kinase, eta
RAB2A	ENST00000262646.7	RAB2A, member RAS oncogene family
CTDSPL2	ENST00000260327.4	CTD (carboxy-terminal domain, RNA polymerase II, polypeptide A) small phosphatase like 2
CCNK	ENST00000389879.5	cyclin K
KIAA1211	ENST00000504228.1	KIAA1211
XYLT1	ENST00000261381.6	xylosyltransferase I
CDK14	ENST00000380050.3	cyclin-dependent kinase 14
ROCK1	ENST00000399799.2	Rho-associated, coiled-coil containing protein kinase 1
CHRM2	ENST00000445907.2	cholinergic receptor, muscarinic 2
DCX	ENST00000356915.2	doublecortin
PLD5	ENST00000536534.2	phospholipase D family, member 5
RUNX1T1	ENST00000523629.1	runt-related transcription factor 1; translocated to, 1 (cyclin D-related)
KIF26B	ENST00000366518.4	kinesin family member 26B
REEP5	ENST00000545426.1	receptor accessory protein 5
METAP2	ENST00000323666.5	methionyl aminopeptidase 2
ZFAND5	ENST00000237937.3	zinc finger, AN1-type domain 5
RASAL2	ENST00000448150.3	RAS protein activator like 2
GNE	ENST00000396594.3	glucosamine (UDP-N-acetyl)-2-epimerase/N-acetylmannosamine kinase
CABP7	ENST00000216144.3	calcium binding protein 7
SLC7A8	ENST00000469263.1	solute carrier family 7 (amino acid transporter light chain, L system), member 8
ZBTB10	ENST00000430430.1	zinc finger and BTB domain containing 10
RAB5B	ENST00000553116.1	RAB5B, member RAS oncogene family
FBRSL1	ENST00000434748.2	fibrosin-like 1
SMAD3	ENST00000327367.4	SMAD family member 3
ZFHX3	ENST00000268489.5	zinc finger homeobox 3
PCNP	ENST00000296024.5	PEST proteolytic signal containing nuclear protein
FAM102B	ENST00000370035.3	family with sequence similarity 102, member B
KCTD12	ENST00000377474.2	potassium channel tetramerization domain containing 12
SMAD5	ENST00000545279.1	SMAD family member 5
AGO2	ENST00000220592.5	argonaute RISC catalytic component 2
GREM1	ENST00000560677.1	gremlin 1, DAN family BMP antagonist
MAPK1IP1L	ENST00000395468.4	mitogen-activated protein kinase 1 interacting protein 1-like
ERBB4	ENST00000342788.4	v-erb-b2 avian erythroblastic leukemia viral oncogene homolog 4
ZMYM2	ENST00000382869.3	zinc finger, MYM-type 2
VWDE	ENST00000275358.3	von Willebrand factor D and EGF domains
TMEM106B	ENST00000396667.3	transmembrane protein 106B
ZNF24	ENST00000589881.1	zinc finger protein 24
ADIPOR2	ENST00000357103.4	adiponectin receptor 2
GMCL1	ENST00000282570.3	germ cell-less, spermatogenesis associated 1
PIK3R3	ENST00000262741.5	phosphoinositide-3-kinase, regulatory subunit 3 (gamma)
TMEM242	ENST00000400788.4	transmembrane protein 242
PHF12	ENST00000577226.1	PHD finger protein 12
SKI	ENST00000378536.4	v-ski avian sarcoma viral oncogene homolog
EIF4E	ENST00000450253.2	eukaryotic translation initiation factor 4E
CDH6	ENST00000265071.2	cadherin 6, type 2, K-cadherin (fetal kidney)
KIAA1432	ENST00000414202.2	KIAA1432
MAP4K4	ENST00000413150.2	mitogen-activated protein kinase kinase kinase kinase 4
GDF6	ENST00000287020.5	growth differentiation factor 6
FUBP1	ENST00000370767.1	far upstream element (FUSE) binding protein 1
UBA2	ENST00000246548.4	ubiquitin-like modifier activating enzyme 2
STOX2	ENST00000308497.4	storkhead box 2
ONECUT3	ENST00000382349.4	one cut homeobox 3
MAP3K3	ENST00000361357.3	mitogen-activated protein kinase kinase kinase 3
JPH3	ENST00000284262.2	junctophilin 3
SNX27	ENST00000368843.3	sorting nexin family member 27
NFATC2	ENST00000371564.3	nuclear factor of activated T-cells, cytoplasmic, calcineurin-dependent 2
SOCS5	ENST00000306503.5	suppressor of cytokine signaling 5
NRP2	ENST00000360409.3	neuropilin 2
ARHGEF37	ENST00000333677.6	Rho guanine nucleotide exchange factor (GEF) 37
GLIS3	ENST00000324333.10	GLIS family zinc finger 3
UNC80	ENST00000439458.1	unc-80 homolog (C. elegans)
RSBN1	ENST00000261441.5	round spermatid basic protein 1
PTPRF	ENST00000372414.3	protein tyrosine phosphatase, receptor type, F
ZFP91	ENST00000316059.6	ZFP91 zinc finger protein
ZNF469	ENST00000437464.1	zinc finger protein 469
LIPG	ENST00000261292.4	lipase, endothelial
EDEM1	ENST00000256497.4	ER degradation enhancer, mannosidase alpha-like 1
ZBTB16	ENST00000335953.4	zinc finger and BTB domain containing 16
ACVR2B	ENST00000352511.4	activin A receptor, type IIB
DCUN1D3	ENST00000324344.4	DCN1, defective in cullin neddylation 1, domain containing 3
STRN	ENST00000263918.4	striatin, calmodulin binding protein
PPARGC1B	ENST00000309241.5	peroxisome proliferator-activated receptor gamma, coactivator 1 beta
PJA2	ENST00000361189.2	praja ring finger 2, E3 ubiquitin protein ligase
MBD5	ENST00000407073.1	methyl-CpG binding domain protein 5
ZC3H12B	ENST00000338957.4	zinc finger CCCH-type containing 12B
EML5	ENST00000554922.1	echinoderm microtubule associated protein like 5
TIMP3	ENST00000266085.6	TIMP metallopeptidase inhibitor 3
GATAD2B	ENST00000368655.4	GATA zinc finger domain containing 2B
BAZ2A	ENST00000379441.3	bromodomain adjacent to zinc finger domain, 2A
TGFB2	ENST00000366930.4	transforming growth factor, beta 2
UBE2W	ENST00000517608.1	ubiquitin-conjugating enzyme E2W (putative)
JAKMIP2	ENST00000507386.1	janus kinase and microtubule interacting protein 2
PARP8	ENST00000503750.2	poly (ADP-ribose) polymerase family, member 8
C17orf75	ENST00000577809.1	chromosome 17 open reading frame 75
CBFA2T2	ENST00000375279.2	core-binding factor, runt domain, alpha subunit 2; translocated to, 2
AC026703.1	ENST00000326958.1
SMURF1	ENST00000361368.2	SMAD specific E3 ubiquitin protein ligase 1
PHACTR4	ENST00000373839.3	phosphatase and actin regulator 4
GPSM2	ENST00000406462.2	G-protein signaling modulator 2
SESTD1	ENST00000428443.3	SEC14 and spectrin domains 1
CBX5	ENST00000209875.4	chromobox homolog 5
GLCE	ENST00000559420.2	glucuronic acid epimerase
GPCPD1	ENST00000379019.4	glycerophosphocholine phosphodiesterase GDE1 homolog (S. cerevisiae)
DAGLA	ENST00000257215.5	diacylglycerol lipase, alpha
WT1	ENST00000379079.2	Wilms tumor 1
NRK	ENST00000243300.9	Nik related kinase
PPAP2B	ENST00000371250.3	phosphatidic acid phosphatase type 2B
PCDH17	ENST00000377918.3	protocadherin 17
FAM189A1	ENST00000261275.4	family with sequence similarity 189, member A1
MEGF9	ENST00000373930.3	multiple EGF-like-domains 9
NCAN	ENST00000252575.6	neurocan
ADCY6	ENST00000357869.3	adenylate cyclase 6
TNKS2	ENST00000371627.4	tankyrase, TRF1-interacting ankyrin-related ADP-ribose polymerase 2
GHR	ENST00000230882.4	growth hormone receptor
ZNF280C	ENST00000370978.4	zinc finger protein 280C
TRERF1	ENST00000541110.1	transcriptional regulating factor 1
NDST1	ENST00000261797.6	N-deacetylase/N-sulfotransferase (heparan glucosaminyl) 1
UHRF1BP1L	ENST00000279907.7	UHRF1 binding protein 1-like
UBQLN2	ENST00000338222.5	ubiquilin 2
GABBR2	ENST00000259455.2	gamma-aminobutyric acid (GABA) B receptor, 2
CDC42BPB	ENST00000361246.2	CDC42 binding protein kinase beta (DMPK-like)
KDM3A	ENST00000409556.1	lysine (K)-specific demethylase 3A
LRRTM3	ENST00000361320.4	leucine rich repeat transmembrane neuronal 3
CLSTN3	ENST00000266546.6	calsyntenin 3
SIN3A	ENST00000394947.3	SIN3 transcription regulator family member A
RIPK4	ENST00000332512.3	receptor-interacting serine-threonine kinase 4
ARNT2	ENST00000303329.4	aryl-hydrocarbon receptor nuclear translocator 2
ENPP5	ENST00000371383.2	ectonucleotide pyrophosphatase/phosphodiesterase 5 (putative)
ZCCHC14	ENST00000268616.4	zinc finger, CCHC domain containing 14
EDA	ENST00000374553.2	ectodysplasin A
WEE1	ENST00000299613.6	WEE1 homolog (S. pombe)
ARHGEF11	ENST00000368194.3	Rho guanine nucleotide exchange factor (GEF) 11
ZC3H7B	ENST00000352645.4	zinc finger CCCH-type containing 7B
CHMP5	ENST00000419016.2	charged multivesicular body protein 5
PRPF40A	ENST00000410080.1	PRP40 pre-mRNA processing factor 40 homolog A (S. cerevisiae)
MOB1B	ENST00000309395.2	MOB kinase activator 1B
KCTD3	ENST00000259154.4	potassium channel tetramerization domain containing 3
MYSM1	ENST00000472487.1	Myb-like, SWIRM and MPN domains 1
KPNA4	ENST00000334256.4	karyopherin alpha 4 (importin alpha 3)
FAM204A	ENST00000369183.4	family with sequence similarity 204, member A
CYTH3	ENST00000350796.3	cytohesin 3
TM9SF3	ENST00000371142.4	transmembrane 9 superfamily member 3
ABI2	ENST00000295851.5	abl-interactor 2
SMCHD1	ENST00000320876.6	structural maintenance of chromosomes flexible hinge domain containing 1
DCTN4	ENST00000447998.2	dynactin 4 (p62)
RALGPS1	ENST00000259351.5	Ral GEF with PH domain and SH3 binding motif 1
SH2B3	ENST00000341259.2	SH2B adaptor protein 3
SETBP1	ENST00000282030.5	SET binding protein 1
PHF8	ENST00000338946.6	PHD finger protein 8
KITLG	ENST00000228280.5	KIT ligand
MEX3A	ENST00000532414.2	mex-3 RNA binding family member A
WIPF3	ENST00000409290.1	WAS/WASL interacting protein family, member 3
PALM2	ENST00000448454.2	paralemmin 2
DR1	ENST00000370272.4	down-regulator of transcription 1, TBP-binding (negative cofactor 2)
USP6NL	ENST00000609104.1	USP6 N-terminal like
PACS2	ENST00000447393.1	phosphofurin acidic cluster sorting protein 2
PRDM4	ENST00000228437.5	PR domain containing 4
ING5	ENST00000313552.6	inhibitor of growth family, member 5
AZI2	ENST00000479665.1	5-azacytidine induced 2
CUL4A	ENST00000326335.4	cullin 4A
CTTNBP2NL	ENST00000271277.6	CTTNBP2 N-terminal like
ATP13A3	ENST00000439040.1	ATPase type 13A3
HMGCR	ENST00000287936.4	3-hydroxy-3-methylglutaryl-CoA reductase
GRSF1	ENST00000254799.6	G-rich RNA sequence binding factor 1
PAWR	ENST00000328827.4	PRKC, apoptosis, WT1, regulator
PRR12	ENST00000418929.2	proline rich 12
NSL1	ENST00000422588.2	NSL1, MIS12 kinetochore complex component
TMEM33	ENST00000504986.1	transmembrane protein 33
IGF1	ENST00000337514.6	insulin-like growth factor 1 (somatomedin C)
LDLRAD4	ENST00000399848.3	low density lipoprotein receptor class A domain containing 4
CDCA2	ENST00000330560.3	cell division cycle associated 2
NPR3	ENST00000265074.8	natriuretic peptide receptor C/guanylate cyclase C (atrionatriuretic peptide receptor C)
SEMA7A	ENST00000261918.4	semaphorin 7A, GPI membrane anchor (John Milton Hagen blood group)
SIKE1	ENST00000369528.5	suppressor of IKBKE 1
SLC16A10	ENST00000368850.3	solute carrier family 16 (aromatic amino acid transporter), member 10
NRG2	ENST00000394770.1	neuregulin 2
DNMT3A	ENST00000380746.4	DNA (cytosine-5-)-methyltransferase 3 alpha
PRKD3	ENST00000379066.1	protein kinase D3
OSBPL8	ENST00000393249.2	oxysterol binding protein-like 8
DDN	ENST00000421952.2	dendrin
ANKRD28	ENST00000399451.2	ankyrin repeat domain 28
GRAMD1B	ENST00000529750.1	GRAM domain containing 1B
FZD5	ENST00000295417.3	frizzled family receptor 5
SLC22A23	ENST00000436008.2	solute carrier family 22, member 23
SEC63	ENST00000369002.4	SEC63 homolog (S. cerevisiae)
CLYBL	ENST00000376355.3	citrate lyase beta like
BNC2	ENST00000380672.4	basonuclin 2
ADNP	ENST00000371602.4	activity-dependent neuroprotector homeobox
USP15	ENST00000353364.3	ubiquitin specific peptidase 15
VAPA	ENST00000400000.2	VAMP (vesicle-associated membrane protein)-associated protein A, 33kDa
KCMF1	ENST00000409785.4	potassium channel modulatory factor 1
ZBTB20	ENST00000462705.1	zinc finger and BTB domain containing 20
CNTNAP5	ENST00000431078.1	contactin associated protein-like 5
CAPS	ENST00000222125.5	calcyphosine
CSMD1	ENST00000400186.3	CUB and Sushi multiple domains 1
RPP14	ENST00000445193.3	ribonuclease P/MRP 14kDa subunit
PTPLA	ENST00000361271.3	protein tyrosine phosphatase-like (proline instead of catalytic arginine), member A
